# Supplementary material for: Mitochondrial DNA Changes in Respiratory Complex I Genes in Brain Gliomas
Source: MDPI journal article supplement (doi:10.3390/biomedicines11041183), 2023-04-15
Supplement: s1 [file s1]

*Supplementary Materials*

# **Mitochondrial DNA Changes in Respiratory Complex I Genes in Brain Gliomas**

Paulina Kozakiewicz, Ludmiła Grzybowska-Szatkowska, Marzanna Ciesielka, Paulina Całka, Jacek Osuchowski, Paweł Szmygin, Bożena Jarosz, Marta Ostrowska-Leśko, Jarosław Dudka, Angelika Tkaczyk-Wlizło and Brygida Ślaska

## ND1 evaluation with TMHMM Server

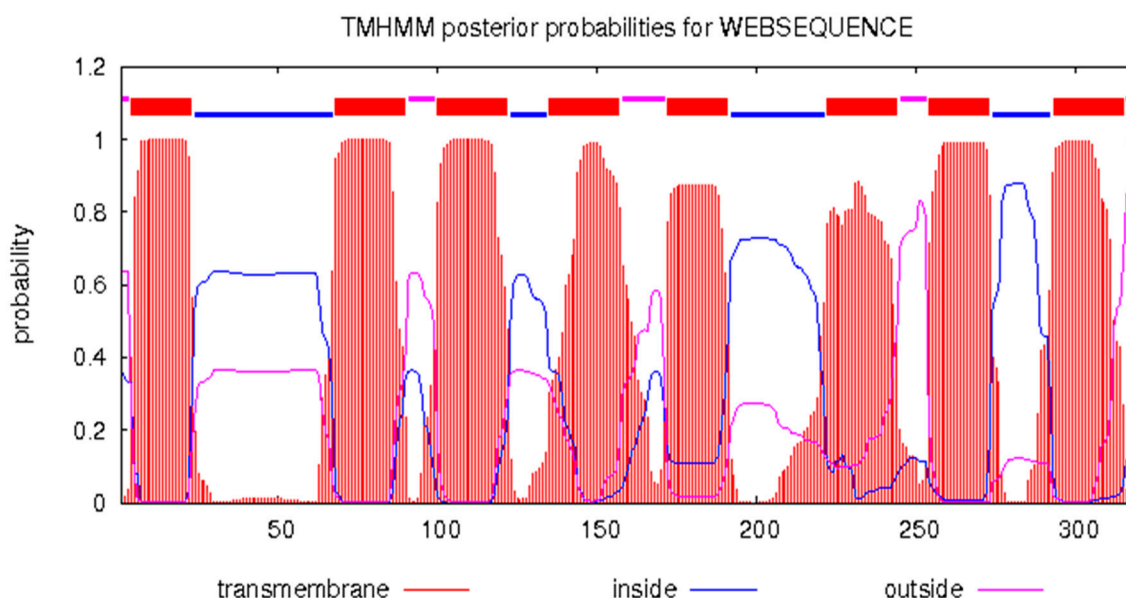

```
# WEBSEQUENCE Length: 318
# WEBSEQUENCE Number of predicted TMHs: 8
# WEBSEQUENCE Exp number of AAs in TMHs: 167.91966
# WEBSEQUENCE Exp number, first 60 AAs: 19.37957
# WEBSEQUENCE Total prob of N-in: 0.36409
# WEBSEQUENCE POSSIBLE N-term signal sequence
WEBSEQUENCE TMHMM2.0 outside 1 3
WEBSEQUENCE TMHMM2.0 TMhelix 4 23
WEBSEQUENCE TMHMM2.0 inside 24 67
WEBSEQUENCE TMHMM2.0 TMhelix 68 90
WEBSEQUENCE TMHMM2.0 outside 91 99
WEBSEQUENCE TMHMM2.0 TMhelix 100 122
WEBSEQUENCE TMHMM2.0 inside 123 134
WEBSEQUENCE TMHMM2.0 TMhelix 135 157
WEBSEQUENCE TMHMM2.0 outside 158 171
WEBSEQUENCE TMHMM2.0 TMhelix 172 191
WEBSEQUENCE TMHMM2.0 inside 192 221
WEBSEQUENCE TMHMM2.0 TMhelix 222 244
WEBSEQUENCE TMHMM2.0 outside 245 253
WEBSEQUENCE TMHMM2.0 TMhelix 254 273
WEBSEQUENCE TMHMM2.0 inside 274 292
WEBSEQUENCE TMHMM2.0 TMhelix 293 315
WEBSEQUENCE TMHMM2.0 outside 316 318
```

**Figure S1. 1** Reference protein ND1 according to the Cambridge sequence (red font indicates the places where the amino acid shift took place).

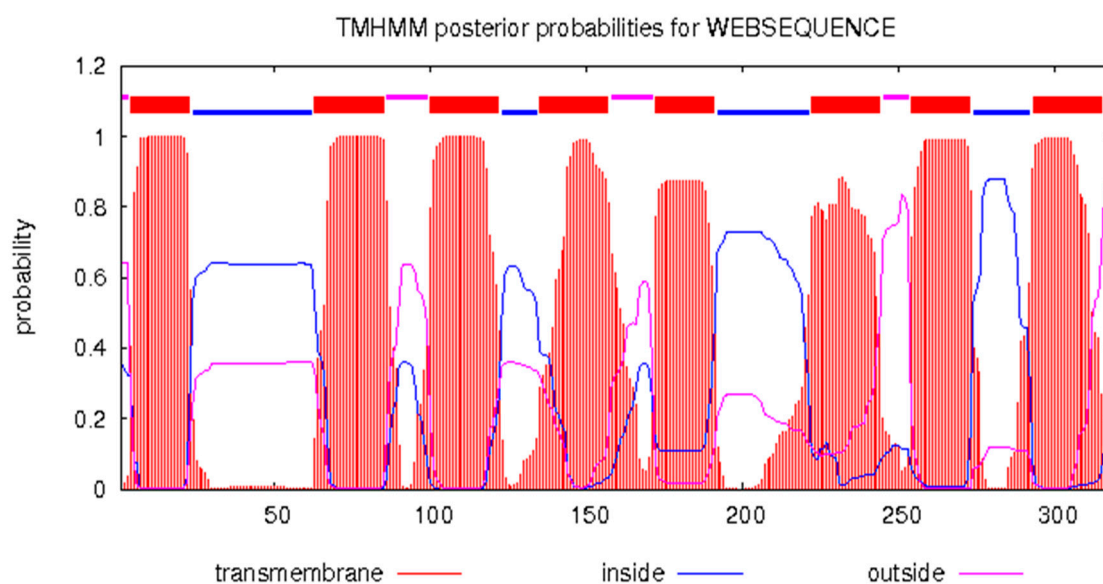

```
# WEBSEQUENCE Length: 318
# WEBSEQUENCE Number of predicted TMHs: 8
# WEBSEQUENCE Exp number of AAs in TMHs: 168.01817
# WEBSEQUENCE Exp number, first 60 AAs: 19.33487
# WEBSEQUENCE Total prob of N-in: 0.35825
# WEBSEQUENCE POSSIBLE N-term signal sequence
WEBSEQUENCE TMHMM2.0 outside 1 3
WEBSEQUENCE TMHMM2.0 TMhelix 4 23
WEBSEQUENCE TMHMM2.0 inside 24 62
WEBSEQUENCE TMHMM2.0 TMhelix 63 85
WEBSEQUENCE TMHMM2.0 outside 86 99
WEBSEQUENCE TMHMM2.0 TMhelix 100 122
WEBSEQUENCE TMHMM2.0 inside 123 134
WEBSEQUENCE TMHMM2.0 TMhelix 135 157
WEBSEQUENCE TMHMM2.0 outside 158 171
WEBSEQUENCE TMHMM2.0 TMhelix 172 191
WEBSEQUENCE TMHMM2.0 inside 192 221
WEBSEQUENCE TMHMM2.0 TMhelix 222 244
WEBSEQUENCE TMHMM2.0 outside 245 253
WEBSEQUENCE TMHMM2.0 TMhelix 254 273
WEBSEQUENCE TMHMM2.0 inside 274 292
WEBSEQUENCE TMHMM2.0 TMhelix 293 315
WEBSEQUENCE TMHMM2.0 outside 316 318
```

**Figure S1. 2** The protein ND1 with change T67A (red font indicates the shift of aminoacids in the protein).

## ND3 evaluation with TMHMM Server

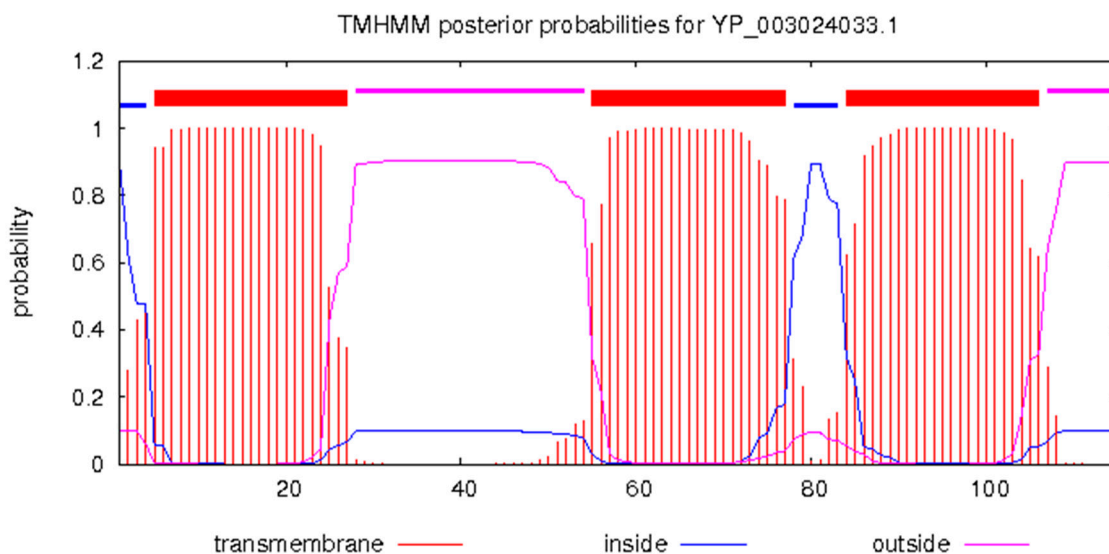

```
# WEBSEQUENCE Length: 115
# WEBSEQUENCE Number of predicted TMHs: 3
# WEBSEQUENCE Exp number of AAs in TMHs: 66.83257
# WEBSEQUENCE Exp number, first 60 AAs: 28.03563
# WEBSEQUENCE Total prob of N-in: 0.90203
# WEBSEQUENCE POSSIBLE N-term signal sequence
WEBSEQUENCE      TMHMM2.0      inside      1      4
WEBSEQUENCE      TMHMM2.0      TMhelix     5      27
WEBSEQUENCE      TMHMM2.0      outside     28     54
WEBSEQUENCE      TMHMM2.0      TMhelix    55     77
WEBSEQUENCE      TMHMM2.0      inside     78     83
WEBSEQUENCE      TMHMM2.0      TMhelix    84    106
WEBSEQUENCE      TMHMM2.0      outside   107    115
```

**Figure S2. 1** Reference protein ND3 according to the Cambridge sequence (red font indicates the places where the amino acid shift took place).

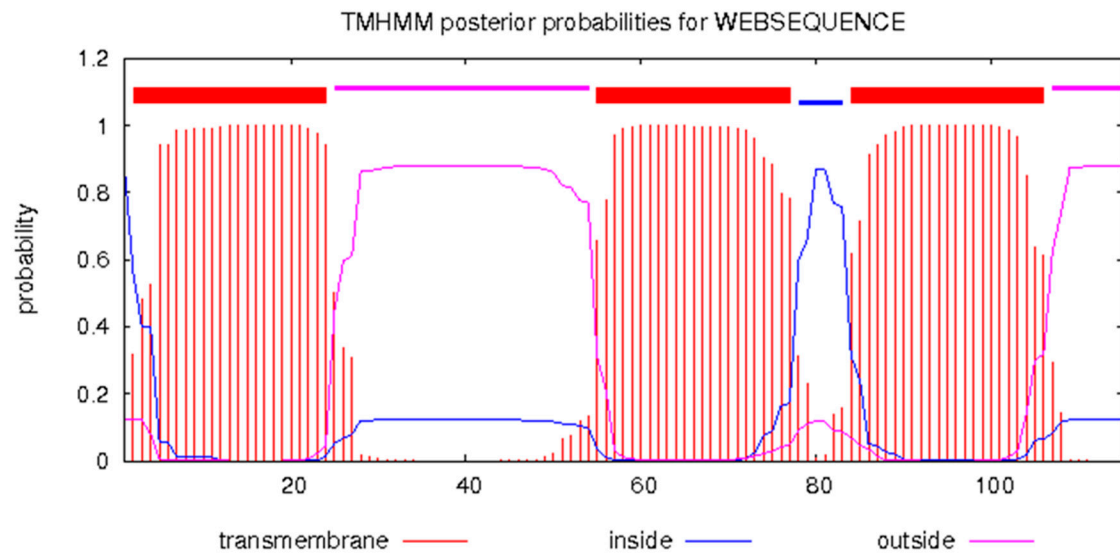

```
# WEBSEQUENCE Length: 115
# WEBSEQUENCE Number of predicted TMHs: 3
# WEBSEQUENCE Exp number of AAs in TMHs: 66.82263
# WEBSEQUENCE Exp number, first 60 AAs: 28.06473
# WEBSEQUENCE Total prob of N-in: 0.87812
# WEBSEQUENCE POSSIBLE N-term signal sequence
WEBSEQUENCE TMHMM2.0 inside 1 1
WEBSEQUENCE TMHMM2.0 TMhelix 2 24
WEBSEQUENCE TMHMM2.0 outside 25 54
WEBSEQUENCE TMHMM2.0 TMhelix 55 77
WEBSEQUENCE TMHMM2.0 inside 78 83
WEBSEQUENCE TMHMM2.0 TMhelix 84 106
WEBSEQUENCE TMHMM2.0 outside 107 115
```

**Figure S2. 2** Test protein ND3 with change I9T (red font indicates the shift of amino acids in the protein).

## ND5 evaluation with TMHMM Server

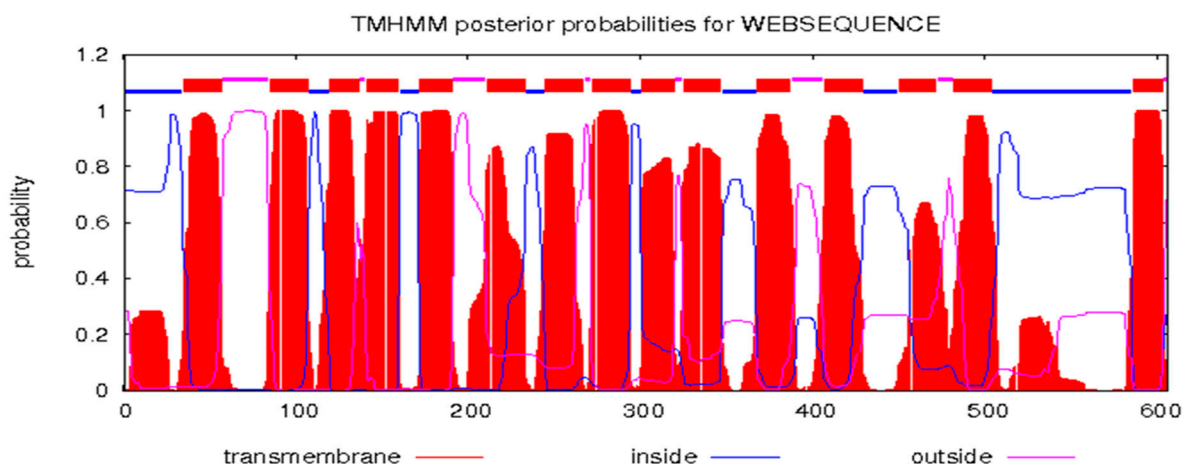

```
# WEBSEQUENCE Length: 606
# WEBSEQUENCE Number of predicted TMHs: 15
# WEBSEQUENCE Exp number of AAs in TMHs: 310.80792
# WEBSEQUENCE Exp number, first 60 AAs: 26.92284
# WEBSEQUENCE Total prob of N-in: 0.71498
# WEBSEQUENCE POSSIBLE N-term signal sequence
```

| WEBSEQUENCE | TMHMM2.0 |         |     |     |
|-------------|----------|---------|-----|-----|
| WEBSEQUENCE | TMHMM2.0 | inside  | 1   | 34  |
| WEBSEQUENCE | TMHMM2.0 | TMhelix | 35  | 57  |
| WEBSEQUENCE | TMHMM2.0 | outside | 58  | 84  |
| WEBSEQUENCE | TMHMM2.0 | TMhelix | 85  | 107 |
| WEBSEQUENCE | TMHMM2.0 | inside  | 108 | 119 |
| WEBSEQUENCE | TMHMM2.0 | TMhelix | 120 | 137 |
| WEBSEQUENCE | TMHMM2.0 | outside | 138 | 140 |
| WEBSEQUENCE | TMHMM2.0 | TMhelix | 141 | 160 |
| WEBSEQUENCE | TMHMM2.0 | inside  | 161 | 171 |
| WEBSEQUENCE | TMHMM2.0 | TMhelix | 172 | 191 |
| WEBSEQUENCE | TMHMM2.0 | outside | 192 | 210 |
| WEBSEQUENCE | TMHMM2.0 | TMhelix | 211 | 233 |
| WEBSEQUENCE | TMHMM2.0 | inside  | 234 | 244 |
| WEBSEQUENCE | TMHMM2.0 | TMhelix | 245 | 267 |
| WEBSEQUENCE | TMHMM2.0 | outside | 268 | 271 |
| WEBSEQUENCE | TMHMM2.0 | TMhelix | 272 | 294 |
| WEBSEQUENCE | TMHMM2.0 | inside  | 295 | 300 |
| WEBSEQUENCE | TMHMM2.0 | TMhelix | 301 | 320 |
| WEBSEQUENCE | TMHMM2.0 | outside | 321 | 324 |
| WEBSEQUENCE | TMHMM2.0 | TMhelix | 325 | 347 |
| WEBSEQUENCE | TMHMM2.0 | inside  | 348 | 367 |
| WEBSEQUENCE | TMHMM2.0 | TMhelix | 368 | 387 |
| WEBSEQUENCE | TMHMM2.0 | outside | 388 | 406 |
| WEBSEQUENCE | TMHMM2.0 | TMhelix | 407 | 429 |
| WEBSEQUENCE | TMHMM2.0 | inside  | 430 | 449 |
| WEBSEQUENCE | TMHMM2.0 | TMhelix | 450 | 472 |
| WEBSEQUENCE | TMHMM2.0 | outside | 473 | 481 |
| WEBSEQUENCE | TMHMM2.0 | TMhelix | 482 | 504 |
| WEBSEQUENCE | TMHMM2.0 | inside  | 505 | 585 |
| WEBSEQUENCE | TMHMM2.0 | TMhelix | 586 | 603 |
| WEBSEQUENCE | TMHMM2.0 | outside | 604 | 606 |

Figure S3. 1 ND5 reference protein according to the Cambridge sequence.

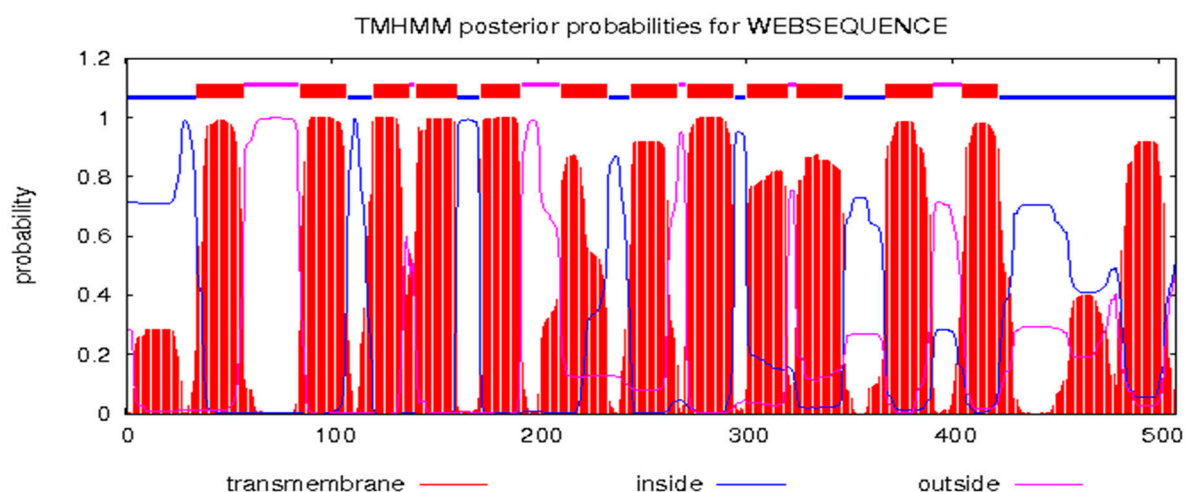

```
# WEBSEQUENCE Length: 508
# WEBSEQUENCE Number of predicted TMHs: 12
# WEBSEQUENCE Exp number of AAs in TMHs: 277.15301
# WEBSEQUENCE Exp number, first 60 AAs: 26.92284
# WEBSEQUENCE Total prob of N-in: 0.71498
# WEBSEQUENCE POSSIBLE N-term signal sequence
```

|             |          |         |     |     |
|-------------|----------|---------|-----|-----|
| WEBSEQUENCE | TMHMM2.0 | inside  | 1   | 34  |
| WEBSEQUENCE | TMHMM2.0 | TMhelix | 35  | 57  |
| WEBSEQUENCE | TMHMM2.0 | outside | 58  | 84  |
| WEBSEQUENCE | TMHMM2.0 | TMhelix | 85  | 107 |
| WEBSEQUENCE | TMHMM2.0 | inside  | 108 | 119 |
| WEBSEQUENCE | TMHMM2.0 | TMhelix | 120 | 137 |
| WEBSEQUENCE | TMHMM2.0 | outside | 138 | 140 |
| WEBSEQUENCE | TMHMM2.0 | TMhelix | 141 | 160 |
| WEBSEQUENCE | TMHMM2.0 | inside  | 161 | 171 |
| WEBSEQUENCE | TMHMM2.0 | TMhelix | 172 | 191 |
| WEBSEQUENCE | TMHMM2.0 | outside | 192 | 210 |
| WEBSEQUENCE | TMHMM2.0 | TMhelix | 211 | 233 |
| WEBSEQUENCE | TMHMM2.0 | inside  | 234 | 244 |
| WEBSEQUENCE | TMHMM2.0 | TMhelix | 245 | 267 |
| WEBSEQUENCE | TMHMM2.0 | outside | 268 | 271 |
| WEBSEQUENCE | TMHMM2.0 | TMhelix | 272 | 294 |
| WEBSEQUENCE | TMHMM2.0 | inside  | 295 | 300 |
| WEBSEQUENCE | TMHMM2.0 | TMhelix | 301 | 320 |
| WEBSEQUENCE | TMHMM2.0 | outside | 321 | 324 |
| WEBSEQUENCE | TMHMM2.0 | TMhelix | 325 | 347 |
| WEBSEQUENCE | TMHMM2.0 | inside  | 348 | 367 |
| WEBSEQUENCE | TMHMM2.0 | TMhelix | 368 | 390 |
| WEBSEQUENCE | TMHMM2.0 | outside | 391 | 404 |
| WEBSEQUENCE | TMHMM2.0 | TMhelix | 405 | 422 |
| WEBSEQUENCE | TMHMM2.0 | inside  | 423 | 508 |

**Figure S3. 2** The protein ND5 with mutation Y506STP.

**Table S1.** Biochemical values of complex I subunits depending on the presence of aminoacid residues in a given position of the protein.

| Change in protein position | Theoretical isoelectric point | Aliphatic index | Instability index      | Grand average of hydropathicity (GRAVY) | The helix percentage                                             | Position in protein structure              |
|----------------------------|-------------------------------|-----------------|------------------------|-----------------------------------------|------------------------------------------------------------------|--------------------------------------------|
| Polymorphisms              |                               |                 |                        |                                         |                                                                  |                                            |
| ND1                        |                               |                 |                        |                                         |                                                                  |                                            |
| Y304H (T4216C)             | 6.29                          | 123.08          | 42.69 protein unstable | 0.676                                   | H13 = 4.86 alpha helix                                           | transmembrane section                      |
| T67A (A3505G)              | 6.11                          | 123.40          | 41.94 protein unstable | 0.690                                   | H5 = 0.07 alpha helix                                            | mitochondrial matrix, low complexity area  |
| T229M (C3992T)             | 6.11                          | 123.08          | 44.06 protein unstable | 0.690                                   | H10 = 2.37 alpha helix                                           | transmembrane section, low complexity area |
| T240A (A4024G)             | 6.11                          | 123.40          | 41.94 protein unstable | 0.690                                   | H10 = 0.79 alpha helix                                           | transmembrane section, low complexity area |
| T263A (A4093G)             | 6.11                          | 123.40          | 41.94 protein unstable | 0.690                                   | H11 = 3.17 alpha helix                                           | transmembrane section                      |
| T164A (A3796G)             | 6.11                          | 123.40          | 41.94 protein unstable | 0.690                                   | H7 = 0.01 alpha helix                                            | transmembrane section                      |
| Normal protein             | 6.11                          | 123.08          | 41.94 protein unstable | 0.682                                   | H5 = 0.07<br>H7 = 0.01<br>H10 = 0.70<br>H11 = 1.95<br>H13 = 8.32 |                                            |
| ND2                        |                               |                 |                        |                                         |                                                                  |                                            |
| A331T (G5460A)             | 9.84                          | 118.93          | 34.35 protein stable   | 0.629                                   | H20 = 0.01 310 helix                                             | transmembrane section, low complexity area |
| V193I (G5046A)             | 9.84                          | 119.51          | 34.90 protein stable   | 0.637                                   | H11 = 0.65 alpha helix                                           | transmembrane section                      |
| Normal protein             | 9.84                          | 119.22          | 34.35 protein stable   | 0.636                                   | H11 = 0.66<br>H20 = 0.37                                         |                                            |
| ND3                        |                               |                 |                        |                                         |                                                                  |                                            |
| T114A (A10398G)            | 4.33                          | 140.87          | 48.95 protein unstable | 1.014                                   | beta roll                                                        | transmembrane section                      |
| I9T (T10084C)              | 4.33                          | 136.61          | 49.07 protein unstable | 0.947                                   | H1 = 40.47 alpha helix                                           | transmembrane section, low complexity area |
| Normal protein             | 4.33                          | 140.00          | 50.62 protein unstable | 0.992                                   | H1 = 53.87                                                       |                                            |
| ND4                        |                               |                 |                        |                                         |                                                                  |                                            |
| I165T (T11253C)            | 9.40                          | 127.73          | 35.98 protein stable   | 0.716                                   | H8 = 1.16 alpha helix                                            | transmembrane section                      |
| Normal protein             | 9.40                          | 128.58          | 35.98 protein stable   | 0.727                                   | H8 = 2.56                                                        |                                            |



| ND5                  |      |        |                            |       |                                                                                 |                                                    |
|----------------------|------|--------|----------------------------|-------|---------------------------------------------------------------------------------|----------------------------------------------------|
| S270N<br>(G13145A)   | 9.14 | 116.12 | 33.37<br>protein<br>stable | 0.567 | H15 = 1.19<br>alpha helix                                                       | transmembrane<br>section                           |
| Y159H<br>(T12811C)   | 9.15 | 116.12 | 34.15<br>protein<br>stable | 0.568 | beta roll                                                                       | transmembrane<br>section                           |
| V24I<br>(G12406A)    | 9.14 | 116.29 | 34.15<br>protein<br>stable | 0.572 | H2 = 0.02<br>alpha helix                                                        | mitochondrial matrix                               |
| C518Y<br>(G13889A)   | 9.18 | 116.12 | 33.47<br>białko stabilne   | 0.565 | H24 = 0.02<br>alpha helix                                                       | mitochondrial matrix                               |
| T556I<br>(C14003T)   | 9.14 | 116.77 | 34.40<br>protein<br>stable | 0.580 | H26 = 0.02<br>pi helix                                                          | mitochondrial ma-<br>trix, low complexity<br>area  |
| N471S<br>(A13748G)   | 9.14 | 116.12 | 33.42<br>protein<br>stable | 0.576 | H22 = 0.49<br>alpha helix                                                       | transmembrane<br>section                           |
| S423T<br>(G13604C)   | 9.14 | 116.12 | 34.01<br>protein<br>stable | 0.572 | H21 = 1.13<br>alpha helix                                                       | transmembrane<br>section                           |
| A475T<br>(G13759A)   | 9.14 | 115.96 | 33.83<br>protein<br>stable | 0.567 | beta roll                                                                       | transmembrane<br>section                           |
| Normal protein       | 9.14 | 116.12 | 34.15<br>protein<br>stable | 0.572 | H2 = 0.02<br>H15 = 1.23<br>H21 = 0.61<br>H22 = 0.48<br>H24 = 0.02<br>H26 = 0.03 |                                                    |
| ND6                  |      |        |                            |       |                                                                                 |                                                    |
| V31A<br>(A14582G)    | 4.18 | 124.66 | 29.48<br>protein<br>stable | 1.057 | H2 = 0.37<br>alpha helix                                                        | transmembrane<br>section, low com-<br>plexity area |
| Normal protein       | 4.18 | 125.75 | 29.48<br>protein<br>stable | 1.071 | H2 = 0.21                                                                       |                                                    |
| Mutations            |      |        |                            |       |                                                                                 |                                                    |
| ND5                  |      |        |                            |       |                                                                                 |                                                    |
| V254M<br>(G13096A)   | 9.14 | 115.64 | 34.35<br>protein<br>stable | 0.568 | H13 = 0.42<br>alpha helix                                                       | transmembrane<br>section                           |
| Y506STP<br>(C13854A) | 8.52 | 114.35 | 32.87<br>protein<br>stable | 0.603 | H23 = 1.23<br>alpha helix                                                       | transmembrane<br>section                           |
| Normal protein       | 9.14 | 116.12 | 34.15<br>protein<br>stable | 0.572 | H13 = 0.42<br>H23 = 2.52                                                        |                                                    |

Abbreviations: ND1, ND2, ND3, ND4, ND4L, ND5, ND6 – subunits of NADH dehydrogenase - complex I of the respiratory chain; H - histidine; Y - tyrosine; A - alanine; T - threonine; M - methionine; I - isoleucine; V - valine; N - asparagine; S - serine; C – cysteine.

**Table S2.** The frequency of occurrence of the amino acid residue depending on the position in the protein, assessed using the PSSM viewer program for complex I (ND1, ND2, ND3, ND4, ND5, ND6).

| <b>Polymorphisms</b>       |                |       |                |            |
|----------------------------|----------------|-------|----------------|------------|
| <b>ND1 (MTH00104)</b>      |                |       |                |            |
| The rest of the amino acid | F <sub>r</sub> |       | F <sub>w</sub> | PSSM score |
|                            |                | Y304H |                |            |
| H                          | 0.69           |       | 0.54           | 9          |
| Y                          | 0.24           |       | 0.32           | 6          |
|                            |                | T67A  |                |            |
| A                          | 0.00           |       | 0.01           | 0          |
| T                          | 0.14           |       | 0.21           | 3          |
|                            |                | T229M |                |            |
| M                          | 0.11           |       | 0.17           | 4          |
| T                          | 0.25           |       | 0.27           | 4          |
|                            |                | T240A |                |            |
| A                          | 0.01           |       | 0.03           | -1         |
| T                          | 0.27           |       | 0.32           | 4          |
|                            |                | T263A |                |            |
| A                          | 0.08           |       | 0.07           | 1          |
| T                          | 0.74           |       | 0.77           | 6          |
|                            |                | T164A |                |            |
| A                          | 0.05           |       | 0.08           | 0          |
| T                          | 0.77           |       | 0.63           | 5          |
| <b>ND2 (MTH00105)</b>      |                |       |                |            |
| The rest of the amino acid | F <sub>r</sub> |       | F <sub>w</sub> | PSSM score |
|                            |                | A331T |                |            |
| T                          | 0.10           |       | 0.13           | 2          |
| A                          | 0.01           |       | 0.01           | -3         |
|                            |                | V193I |                |            |
| I                          | 0.68           |       | 0.69           | 7          |
| V                          | 0.26           |       | 0.22           | 3          |
| <b>ND3 (MTH00106)</b>      |                |       |                |            |
| The rest of the amino acid | F <sub>r</sub> |       | F <sub>w</sub> | PSSM score |
|                            |                | T114A |                |            |
| A                          | 0.18           |       | 0.15           | 1          |
| T                          | 0.60           |       | 0.55           | 5          |
|                            |                | I9T   |                |            |
| T                          | 0.62           |       | 0.53           | 5          |
| I                          | 0.32           |       | 0.39           | 5          |
| <b>ND4 (MTH00110)</b>      |                |       |                |            |
| The rest of the amino acid | F <sub>r</sub> |       | F <sub>w</sub> | PSSM score |
|                            |                | I165T |                |            |
| T                          | 0.10           |       | 0.11           | 1          |
| I                          | 0.30           |       | 0.33           | 4          |
| <b>ND5 (MTH00108)</b>      |                |       |                |            |
| The rest of the amino acid | F <sub>r</sub> |       | F <sub>w</sub> | PSSM score |
|                            |                | S270N |                |            |
| N                          | 0.95           |       | 0.95           | 8          |
| S                          | 0.04           |       | 0.04           | 0          |
|                            |                | Y159H |                |            |
| H                          | 0.24           |       | 0.29           | 7          |
| Y                          | 0.63           |       | 0.60           | 8          |
|                            |                | V24I  |                |            |
| I                          | 0.14           |       | 0.18           | 3          |
| V                          | 0.03           |       | 0.05           | 0          |
|                            |                | C518Y |                |            |
| Y                          | 0.04           |       | 0.06           | 3          |
| C                          | 0.00           |       | 0.00           | -1         |
|                            |                | T556I |                |            |

|                            |                |                |            |
|----------------------------|----------------|----------------|------------|
| I                          | 0.48           | 0.39           | 5          |
| T                          | 0.27           | 0.28           | 4          |
| N471S                      |                |                |            |
| S                          | 0.22           | 0.21           | 3          |
| N                          | 0.72           | 0.70           | 7          |
| S423T                      |                |                |            |
| T                          | -              | -              | -          |
| S                          | 1.00           | 1.00           | 7          |
| A475T                      |                |                |            |
| T                          | 0.59           | 0.56           | 6          |
| A                          | 0.02           | 0.03           | -1         |
| ND6 (MTH00109)             |                |                |            |
| The rest of the amino acid | F <sub>r</sub> | F <sub>w</sub> | PSSM score |
| V31A                       |                |                |            |
| A                          | -              | -              | -          |
| V                          | 0.08           | 0.15           | 2          |
| Mutations                  |                |                |            |
| ND5 (MTH00108)             |                |                |            |
| The rest of the amino acid | F <sub>r</sub> | F <sub>w</sub> | PSSM score |
| V254M                      |                |                |            |
| M                          | 0.01           | 0.02           | 0          |
| V                          | 0.98           | 0.97           | 7          |

Bold type indicates an amino acid that appears in the reference sequence in mtDB - Human Mitochondrial Genome Database (<http://www.mtodb.igp.uu.se/>; Uppsala, Sweden). Normal font indicates the amino acid in the test material. Explanations in the list of abbreviations. Abbreviations: ND1, ND2, ND3, ND4, ND4L, ND5, ND6 – subunits of NADH dehydrogenase - complex I of the respiratory chain; Fr (raw frequency/ unweighted frequency) – initial frequency - these are the initial frequency bars showing the real (unweighted) residual frequencies at each position of the seed alignment in conserved domains (CD ). The characters in the gaps are treated as normal amino acids in these calculations; Fw (weighted frequency) - the frequency weighted column shows the calculated frequencies using the procedure Henikoff, JG. J Mol Biol. 1994; 243:574-578, modified as described on page 3395 of Altschul SF, et al. Nucleic Acids Res. 1997; 25: 3389-3402. Briefly, sequences similar in seed alignment have less weight in calculating the frequency of the residues as these sequences provide redundant information; H - histidine; Y - tyrosine; A - alanine; T - threonine; M - methionine; I - isoleucine; V - valine; N - asparagine; S - serine; C – cysteine.

**Table S3.** Evaluation of the conservativeness and the effect of changes in amino acid residues occurring in the subunit of complex I on protein function using the SIFT Sequence and ConSurf Database programs.

| Change in protein position | Nucleotide sequence change | The frequency of occurrence of the reference sequence from mtDB – Human Mitochondrial Genome Database | The frequency of occurrence of the change sequence from mtDB – Human Mitochondrial Genome Database | Score value based on evaluation of the effect on protein function in SIFT Sequence (harmfulness of the change) | Conservativeness - normalized scores | Conservativeness - on a scale of 1–9 |
|----------------------------|----------------------------|-------------------------------------------------------------------------------------------------------|----------------------------------------------------------------------------------------------------|----------------------------------------------------------------------------------------------------------------|--------------------------------------|--------------------------------------|
| Polymorphisms              |                            |                                                                                                       |                                                                                                    |                                                                                                                |                                      |                                      |
| ND1                        |                            |                                                                                                       |                                                                                                    |                                                                                                                |                                      |                                      |
| Y304H                      | T4216C                     | 2460                                                                                                  | 244                                                                                                | 1.00<br>(tolerated)                                                                                            | 0.572                                | 3                                    |
| T67A                       | A3505G                     | 2648                                                                                                  | 56                                                                                                 | 0.02<br>(affects the functioning of the protein)                                                               | −0.711                               | 7                                    |
| T229M                      | C3992T                     | 2680                                                                                                  | 24                                                                                                 | 0.05<br>(affects the functioning of the protein)                                                               | 0.464                                | 3                                    |
| T240A                      | A4024G                     | 2682                                                                                                  | 22                                                                                                 | 0.03<br>(affects the functioning of the protein)                                                               | 0.202                                | 4                                    |
| T263A                      | A4093G                     | 2702                                                                                                  | 2                                                                                                  | 0.38<br>(tolerated)                                                                                            | 0.457                                | 4                                    |
| T164A                      | A3796G                     | 2677                                                                                                  | 10                                                                                                 | 0.64<br>(tolerated)                                                                                            | 1.769                                | 1                                    |
| ND2                        |                            |                                                                                                       |                                                                                                    |                                                                                                                |                                      |                                      |
| A331T                      | G5460A                     | 2528                                                                                                  | 176                                                                                                | 0.41<br>(tolerated)                                                                                            | 0.702                                | 3                                    |
| V193I                      | G5046A                     | 2625                                                                                                  | 79                                                                                                 | 1.00<br>(tolerated)                                                                                            | −0.149                               | 5                                    |
| ND3                        |                            |                                                                                                       |                                                                                                    |                                                                                                                |                                      |                                      |
| T114A                      | A10398G                    | 1461                                                                                                  | 1242                                                                                               | 0.66<br>(tolerated)                                                                                            | 0.167                                | 4                                    |
| I9T                        | T10084C                    | 2673                                                                                                  | 31                                                                                                 | 0.39<br>(tolerated)                                                                                            | 0.749                                | 3                                    |
| ND4                        |                            |                                                                                                       |                                                                                                    |                                                                                                                |                                      |                                      |
| I165T                      | T11253C                    | 2694                                                                                                  | 10                                                                                                 | 0.11<br>(tolerated)                                                                                            | −0.197                               | 6                                    |
| ND5                        |                            |                                                                                                       |                                                                                                    |                                                                                                                |                                      |                                      |
| S270N                      | G13145A                    | 2687                                                                                                  | 16                                                                                                 | 1.00<br>(tolerated)                                                                                            | 0.149                                | 5                                    |
| Y159H                      | T12811C                    | 2667                                                                                                  | 37                                                                                                 | 0.63<br>(tolerated)                                                                                            | −0.336                               | 6                                    |
| V24I                       | G12406A                    | 2649                                                                                                  | 55                                                                                                 | 0.60<br>(tolerated)                                                                                            | 0.070                                | 5                                    |
| C518Y                      | G13889A                    | 2697                                                                                                  | 7                                                                                                  | 1.00<br>(tolerated)                                                                                            | 2.400                                | 1                                    |
| T556I                      | C14003T                    | 2702                                                                                                  | 2                                                                                                  | 0.50<br>(tolerated)                                                                                            | −0.196                               | 6                                    |
| N471S                      | A13748G                    | 2702                                                                                                  | 2                                                                                                  | 0.51<br>(tolerated)                                                                                            | 0.516                                | 3                                    |
| S423T                      | G13604C                    | -                                                                                                     | -                                                                                                  | 0.00<br>(affects the functioning of the protein)                                                               | −0.908                               | 8                                    |

|           |         |      |    |                                                       |        |   |
|-----------|---------|------|----|-------------------------------------------------------|--------|---|
| A475T     | G13759A | 2665 | 39 | 0.77<br>(tolerated)                                   | 0.684  | 3 |
| ND6       |         |      |    |                                                       |        |   |
| V31A      | A14582G | 2681 | 23 | 0.96<br>(tolerowana)                                  | -0.678 | 8 |
| Mutations |         |      |    |                                                       |        |   |
| ND5       |         |      |    |                                                       |        |   |
| V254M     | G13096A | -    | -  | 0.04<br>(affecting the<br>function of the<br>protein) | -1.252 | 9 |

Scoring according to SIFT Sequence: change tolerated > 0.05, change affects protein function ≤ 0.05.

Conservativeness on a scale of 1 - 9: 1 - 3 variable region, 4 - 6 region of medium conservativeness, 7 - 9 region highly conserved. Conservativeness by normalized score: variable region < 0, region moderately conserved 0 - 0.5, highly conserved region > 0.5. Abbreviations: H - histidine; Y - tyrosine; A - alanine; T - threonine; M - methionine; I - isoleucine; V - valine; N - asparagine; S - serine; C - cysteine; ND1, ND2, ND3, ND4, ND4L, ND5, ND6 - subunits of NADH dehydrogenase - complex I of the respiratory chain.

**Table S4.** Assessment of the pathogenicity of amino acid residue changes occurring in the subunit of complex I in the Mitlmpact3D program (APOGEE predictor).

| Change in protein position | Nucleotide sequence change | Pathogenicity<br>(scoring according to APOGEE) |
|----------------------------|----------------------------|------------------------------------------------|
| Polymorphisms              |                            |                                                |
| ND1                        |                            |                                                |
| Y304H                      | T4216C                     | Pathogenic (0.73)                              |
| T67A                       | A3505G                     | Neutral (0.31)                                 |
| T229M                      | C3992T                     | Neutral (0.38)                                 |
| T240A                      | A4024G                     | Neutral (0.38)                                 |
| T263A                      | A4093G                     | Neutral (0.36)                                 |
| T164A                      | A3796G                     | Neutral (0.38)                                 |
| ND2                        |                            |                                                |
| A331T                      | G5460A                     | Neutral (0.33)                                 |
| V193I                      | G5046A                     | Neutral (0.31)                                 |
| ND3                        |                            |                                                |
| T114A                      | A10398G                    | Neutral (0.44)                                 |
| I9T                        | T10084C                    | Neutral (0.37)                                 |
| ND4                        |                            |                                                |
| I165T                      | T11253C                    | Pathogenic (0.53)                              |
| ND5                        |                            |                                                |
| S270N                      | G13145A                    | Neutral (0.29)                                 |
| Y159H                      | T12811C                    | Neutral (0.32)                                 |
| V24I                       | G12406A                    | Pathogenic (0.51)                              |
| C518Y                      | G13889A                    | Neutral (0.29)                                 |
| T556I                      | C14003T                    | Neutral (0.41)                                 |
| N471S                      | A13748G                    | Neutral (0.33)                                 |
| S423T                      | G13604C                    | Neutral (0.41)                                 |
| A475T                      | G13759A                    | Neutral (0.4)                                  |
| ND6                        |                            |                                                |
| V31A                       | A14582G                    | Neutral (0.26)                                 |
| Mutations                  |                            |                                                |
| ND5                        |                            |                                                |
| V254M                      | G13096A                    | Neutral (0.31)                                 |

APOGEE scoring: neutral change  $\leq 0.5$ , pathogenic change  $> 0.5$ .  
Abbreviations: H - histidine; Y - tyrosine; A - alanine; T - threonine; M - methionine; I - isoleucine; V - valine; N - asparagine; S - serine; C - cysteine; ND1, ND2, ND3, ND4, ND4L, ND5, ND6 – subunits of NADH dehydrogenase - complex I of the respiratory chain.
